# Supplementary material
Source: PubMed Central journal article supplement (PMC3412673)

## Supplementary Information

# **Polycistronic co-expression and non-denaturing purification of Histone octamers**

Yoonjung Shim<sup>a</sup>, Ming-Rui Duan<sup>b</sup>, Xuejing Chen<sup>a</sup>, Michael J. Smerdon<sup>b</sup>  
and Jung-Hyun Min<sup>a\*</sup>

<sup>a</sup>*Department of Chemistry, University of Illinois at Chicago, Chicago, IL 60607, USA*

<sup>b</sup>*Department of Biochemistry and Biophysics, School of Molecular Biosciences, Washington State University, Pullman, WA 99164, , USA*

### Table of Contents

1. Methods
2. Entire sequence of the histone-encoding polycistronic vector used in this study, depicted in Fig. 1B.
3. Supplementary Table 1 & 2
4. Supplementary Figures 1- 3

## 1. Methods

*Cloning of histones and polycistronic plasmid construction.* *Xenopus laevis* histone genes were amplified by PCR from the plasmids originally made by the Luger laboratory [6]. To construct a polycistronic plasmid as depicted in **Fig. 1B**, we incorporated RBS along with a spacer sequence into the primers for H2B, H3 and H4 (**Table S1**) [14]. A hexahistidine (His<sub>6</sub>) tag was also added to H2A N-terminus between pre-existing S-tag and thrombin site through PCR. The stop codon in H4 C-terminus was deleted, and an in-frame thrombin site was added between H4 and a pre-existing His<sub>6</sub>-tag in a similar fashion (**Table S1**). The primers were purified using standard urea-PAGE protocols [16]. We then inserted these genes into the pET29a vector using standard cloning techniques using restriction enzymes as indicated in **Table S1 and S2**.

*Histone expression.* The resulting plasmid encoding all four core histones was transformed into BL21(DE3)pLysS cells and plated on to an LB agar plate containing kanamycin (50 µg/ml) and chloramphenicol (25 µg/ml). The plate was incubated overnight (~16 h) at 37 °C. For a 1 L scale preparation, one colony was inoculated into 10 mL 2xTY media containing kanamycin (50 µg/ml) and chloramphenicol (25 µg/ml). This starter culture was shaken at 170 rpm for ~4-5 h at 37 °C until slightly cloudy. Subsequently, the culture was amplified into 1 L of the same media and was grown for another 6-7 h at 37 °C. When the OD<sub>600</sub> reaches ~0.4, histone co-expression was induced by adding 0.4 mM isopropyl β-D-1-thiogalactopyranoside (IPTG). The culture was further shaken at 170 rpm at 37 °C for overnight (~20 h). Cells were harvested by centrifugation at 4,500 x g for 10 min at 4 °C. Cell pellets were processed immediately or stored at -80 °C for future purification.

*Cell lysis and Nickel-affinity chromatography.* Cell pellets were resuspended in 60 ml of lysis buffer (20 mM Tris-HCl pH 8.0, 2.0 M sodium chloride (NaCl), 1 mM phenylmethanesulfonylfluoride or Pefabloc SC (Centerchem) and 0.5 mM tris(2-carboxyethyl)phosphine (TCEP)). Resuspended cells were lysed by EmulsiFlex-C3 high pressure

homogenizer (Avestin) and clarified by centrifugation at 38,500 x g at 4 °C for 1 h. The supernatant was collected and imidazole stock solution was added to adjust the concentration to 30 mM. The clarified lysate was then loaded onto a 5 ml HisTrap FF column (GE Healthcare) pre-equilibrated in the Ni-buffer A (20 mM Tris-HCl pH 8.0, 2.0 M sodium chloride, 0.5 mM TCEP) followed by a 10 column volumes (CV) was with Ni-buffer A containing 30 mM imidazole and a 10 CV of Ni-buffer A. The bound proteins were eluted by increasing the imidazole concentration from 30 mM to 500 mM linearly over 23.5 CV. Each fraction was analysed by 18% SDS-PAGE: 10 µl of sample was mixed with the same volume of 2x SDS loading buffer, incubated at 98 °C for 10 min and centrifuged at 17,000 x g for 10 min, after which all supernatant was loaded on the gel. Electrophoresis was run at 150 V for 80 min.

*Thrombin digestion.* Thrombin digestion was carried out by adding purified thrombin (Sigma) in 25:1 mass ratio and incubating the samples at 4 °C for ~ 3 h. The digestion was confirmed by SDS-PAGE.

*Size exclusion chromatography.* Thrombin-digested histones were then concentrated up to 3 mg/ml with ultrafiltration using Amicon YM50 membrane (MWCO 50 kDa) at 4 °C (Millipore). The concentrated sample was then injected onto a Superdex 200 10/300GL column. The histone octamer peak was eluted at an elution volume of 12.8 ml. The peak fractions were pooled and concentrated up to 8 mg/ml, aliquotted and flash-frozen in the presence of 50% glycerol for long-term storage.

*Nucleosome reconstitution.* Nucleosome reconstitution was done essentially as described [7; 8]. The histones and DNA were mixed in the molar ratio of octamer:DNA at 1.1:1 and dialyzed sequentially against TE buffers (10 mM Tris-HCl pH 8.0 and 1 mM EDTA) containing 1 M, 600 mM and 0 mM NaCl, each for at least one hour. The last dialysis was usually done overnight.

The results were verified on 5% native polyacrylamide gels run in 0.25x TBE at 130 V for 1 h at room temperature.

*FRET measurements.* The DNA substrate was internally labeled at positions 6 and 81 in a 601 sequence with Cy3 and Cy5 respectively [10]. The FRET by the dye pairs was measured as described to validate the formation of NCP by the histones [10].

## 2. Entire sequence of the histone-encoding polycistronic vector used in this study, depicted in Fig. 1B.

TGGCGAATGGGACGGCCCTGTAGCGCGCATTAAAGCGCGGGGTTGGTGGTTACGCGCAGCGTGACCCTACTTTGCCAGCGCCCTAGCGCCCGCTCCTTTCCGCTTT  
CTTCCCTTCTTTCTCGCCACGTTTCGCCGGCTTTCCCGTCAAGCTCTAAATCGGGGCTCCCTTTAGGGTTCGGATTAGTGTCTTACGGCACCTCGACCCCAAAAACT  
TGATTAGGGTGTAGTTCACGTAGTGGGCCATCGCCCTGATAGACGGTTTTTCGCCCTTTGACGTTGGAGTCCACGTTCTTTAAATAGTGGACTCTTGTTCACAACTGGAAC  
AACACTCAACCTATCTCGGCTATCTTTTTGATTATAAAGGAAATTTGCCGATTTCGGCCCTATTGGTTAAAAAATGAGCTGATTTAACAAAAATTAACCGCAATTTTAA  
CAAAATATTAACGTTTCAATTTACAGTGGCCTTTTCGGGAAATGTGCCGGAACCCCTATTTGGTTATTTTCTAAATACATTTCAATATGTATCCGCTCATGAATTA  
ATCTTAGAAAACTCATCGAGCATCAATGAAACTGCAATTTATTCATATCAGGATATCAATACCATATTTTGAAGGAGCCGTTTCTGTAATGAAGGAGAAAACTCAC  
CGAGGCAGTCCATAGGATGGCAAGATCTCGGTTCGGTCTCGGATTCGGACTCGTCCAACATCAATACAACCTATTAATTTCCCTCGTCAAAAAATAGGTTATCAAGTG  
AGAAATCACCATGAGTGACACTGAAATCCGGTGAAGATGGCAAAAGTTTATGCATTTCTTCCAGACTTGTTCACAGGCCAGCCATACGTCGTATCAAAATCACTCG  
CATCAACCAACCGTTTATTCATTCGTGATTGGCCCTGAGCGAGAGCAAAATACCGCATCGCTGTAAAAGGACAATTAACAAAGGAATCAATGCAACCGGGCAGGAACA  
CTGCCAGCGCATCAACAATATTTTCCACTGAATCAGGATATTTCTTAATACCTGGAAATGCTGTCTTCGCCGGGATCGCAGTGGTAGTAACCATGATCATCAGGAGTAC  
GGATAAAATGCTTGTATGGTTCGGAAGAGGCATAAATFCCGTCAGCCAGTTTAGTCTGACCATTCATCTGTAAACATCATTGGCAAGCTACCTTTGCCATGTTTCAGAAAA  
ACTCTGGCGCATCGGGCTTCCCATACAATCGATAGATTGTCGCACTGATTGCCCGACATTAATCGCGAGCCCATTTATACCCATATAAATCAGCATCCATGTTGGAATTTA  
ATCGCGCCATAGAGCAAGTCTGACCTTCCCGTTGAATATGGCTCATAACACCCCTTGTATTACTAGTGTATGTAAGCAGACAGTTTTATTTGTCATGACCAAAATCCCTTAACGT  
GAGTTTTCTGTTCCATGAGCGTCAGACCCCGTAGAAAAGATCAAAGGATCTTCTTGTGATCTCTTTTTCTCGCGGTAATCTGCTGTTGCAAAACAAAAAACCACCGGTA  
CCAGCGGTGGTTGTTTTCGGGATCAAGAGCTACCAACTCTTTTTCCGAAGGTAATCGGTTTCAGCAGAGCGCAGATACCAAACTACTGTCTTCTAGTGTAGCCGTGATTA  
GGCCACCACTTCAAGAACTCTGACACCCGCTACATACCTCGCTCGCTAATCTGTTTACAGTGGCTGCTCAGGGGGCGGAGCCATGGGAAAACCGCAGCAACCGCCCTTTTA  
AGCATAGTTACCGGATAGCGCGAGCGGTGGGCTGAACGGGGGTTCTGTCAACAGCCAGCTTGGAGCGAACGACTACACCGAACTGAGATACCTACAGCGTGAG  
CTATGAGAAAGCGCCACGCTTCCGAAGGGAGAAAGCGGACAGGATCCGGTAAGCGGCGAGGTTCCGAACAGGAGAGCGCAGAGGGAGCTTCCAGGGGAAACCGCTGG  
TATCTTTATAGTCTGTCCGGTTCGCCACCTCTGACTTTGAGCGCTCGATTTTTGTGATGCTCGTCAGGGGGCGGAGCCATGGGAAAACCGCAGCAACCGCCCTTTTA  
CGGTTCTGGCCTTTGCTGGCCTTTGCTCACATGTTCTTCTCGGTTATCCCTGATTCTGTGGATAACCGTATTACCCTTGTAGTGTAGCTGATACCGCTCGCCGC  
AGCCGAAAGCGCAGCGAGCTCAGTGTAGCGAGGAAGCGGAAGAGCGCTGATGCGGTTTCTCTTACGCATCTGTGGGTTTTCACACCCGATATATGGTGCA  
CTCTCAGTACAATCTGTCTGTATGGCATAGTTAAGCCAGTAAACACTCCGCTATCGCTGACTGGGTCAATGGCTGGCCCGCAGACACCGGCTTACCTGCTCAAC  
GCCCTGACGGGTTCTGCTCCGGCATCCGCTTACAGACAAGCTGTGACCGCTCCGGGAGCTGCATGTGTAGAGGTTTTACCGTTCATCACCAGAAACCGCGGAGGCA  
GCTCGGTTAAAGCTCATCAGCGTGGTGTGAAGGATTCACAGATGTCTGCCTGTTCATCCGCTCCAGCTCGTTGAGTTTTCCAGAAGCGTAAATGTCTGGCTTCTGAT  
AAAGCGGGCCATGTTAAGGGCGTTTTTTCCTGTTTGGTCACTGATCCCTCGTGAAGGAGACAGTATAAAGTGGCGCAGCATAGTTCGGCGCAGGATGATGATGCGGAGGAGT  
CACGATACGGGTTACTGATGATGAACATGCCCGTTACTGGAACGTTGTGAGGTTAAACAACCTGGCGGTATGGATGCGGCGGACCCAGAGAAAAATCACTCAGGTTCAATG  
CCAGCGCTTCGTTAATACAGATGTAGGTGTTCCACAGGTAGCCAGCAGCATCTGCGATGCAGATCCGGAACATAATGGTGCAGGGCGCTGACTCCCGCTTCCAGACT  
TTACGAAACCGGAAACCGGAGACCATTCATGTTGTGCTCAGGTCGACAGACTTTGACAGCAGCTCGCTTCACGTTCCGCTCCGCTACGGTATTCATTCGCTCAAC  
AGTAAGGCAACCCCGCAGCTTAGCCGGTCTCAACGACAGGAGCAGCATATGCGCACCCGTTGGGCGCCGATGCGGGGATAATGGCCTGCTTCTCGCGAAACGTTTT  
GGTGGCGGACAGTGCAGAAAGCTTGAAGCGGTTGAGCGAGGGCGTGAAGATTCCGAATACCGAAAGCAGCGCCGATCATCTGCTCGCTCCAGCGAAAGCGGTTCTCGCGAAAT  
GATCCAGGCGCTGCCGCACCTGCCACGTTACAGTTAGCATGATAAAGAGACAGTATAAAGTGGCGCAGCATAGTTCGGCGCAGGATGATGATGCGGAGGAGTGAATGGGTT  
GAAGGCTCTCAAGGGCATCGGTCAGATCCCGGTGCCATAATGAGTGAGTAACTTACATTAATTCGGTTGCGCTCACTGCCCGCTTCCAGTCCGGAAACCTGTCGTGCCA  
GCTGCATTAATGAATCGGCCAACCGCGGGGAGAGGGGTTTTGCGTATTGGGCGCCAGGGTGGTTTTCTTTTCCAGTGTAGAGCGGCAACAGCTGATTTGCCCTTCCCG  
CTGCGCCCTGAGAGGTTGAGCAAGCGTCCACGCTGGTTCCACCCAGCGGCAAAATCGTTTTGATGGTGTAAACGGCGGATATAACATGAGCTGTCTTCCGGTAT  
CGTCTATCCACTACCGAGATGTCCGCAACACCGCGCAGCCGCTCGTAAATGGCGGATTTGCCCGCAGCGCCATCTGATCGTGGCAACAGCATGCGATGGGAA  
GATGCCCTATTCACTGAGTTCGATGTTGTGTTGAAAACCGGACATGGCATTCAGTCCGCTTCCGCTATCGCTGATTTGATAGCAGGAGATTTTATGTC  
AGCCAGCGCAGCAGAGCGCGGAGACAGAACTTAATGGGCGCTAACAGCGCGATTGCTGTTGACCCCAATGCGACCAATGCGAGGATCTCCACGCGCAGTCCGCTACCGCTT  
CATGGGAAAAATAACTGTTGATGGTGTCTGTGTCAGAGACATCAAGAAAATACCGCCGAAACATATAGTGCAGGCGAGCTCCACAGCAATGGCATCTGGTCACTCCAGG  
GATAGTTAATGATCAGCCATGACGCTGACGCGTTGCGCGAAGATTGTGCACCCGCGCTTACAGGCTTCGACCGCGCTTCCGCTTACCATGCACACACCACCGTGGCCCA  
GTTGATCGGCGGAGATTTAATCGCCCGGACAAATTTGGCAGCGCGCTGACGGGGCAGACTGGAGGTTGGCAACGCAATCAGCAACGACTGTTTGGCCGCGGTTGTTGTG  
CCACCGGTTGGGAATGTAATTCAGCTCCGCCATCGCGCTTCCACTTTTTCCCGGTTTTGCGAGAACTGGCTGGCTGGTTCACCAAGCGGAAACCGTCTGATAAG  
AGACACCGGCATACTCTCGGACATCGTATAACGTTACTGTTTTCACTTCACTTCACTTCACTTCTTCCGCGGCTATCATGGCATAACCGCAAGGTTTTTGGC  
ATTCGATGGTGTCCGGATCTCGACGCTCTCCCTTATGCGACTCTGCATTAGGAAGCAGCCAGTAGTAGGTTGAGGCGGTTAGCACCGCGCGCAAGGAATGGTGCA  
TGCAAGGAGATGGCCCAACAGTCCCGCGCCACGGGGCTGCCACCATACCCAGCCGAAACAGGCTCATGAGCCCAAGTGGCGAGCCCGATTTCCCATCCGTT  
ATGTCGGCGATAATAGCGCCAGCAACCGCACCTGTGGCGCGGTGATGCCGCCAGATGCGTCCGGGTAGAGGATCGAGATCGATCTCATCTCCTCCCGCAAGATTAATAGCA  
CTCACTATAGGGAAATTGTGAGCGGATAACAATTTCCCTCTAGAAAATTTTTGTTTAACTTTAAGAAGGAGATATACATATGAAAGAAACCGCTGCTGCTAAATTCGAAC  
GCCAGCACATGGACAGCCAGATCTGCACCACCACCACCACCGTACCTGGTCCACGCGGTTCCATGGGtATGTGAGGAAAGGCAAAACAGGGCGTTAAAACCGCG  
CTAAGGCCAAGACTCGCTCATCTCGGCTGGGCTACAGTTCCCTGTTGGCGGTTTACCAGGCTTAAAGAAAGGCAATTTGAGAGCGGGTGGAGCTGGAGCTTAG  
TCTATCTGGCTCGAGTGTGGAGTATCTGACCGCTGAGATTTTGAATTTGGCGGAAATGCGGCGCGTATAACAAGAAGACTCGCATTATCCCCAGACACCTGCAGCTCG  
CTGTGCGCAACGATGAGGAACGAACAACCTGCTCGGAAGAGTCACTATCGCTCAGGCGGGGCTCCGCCAACATCCAGTCCGTTGCTGCCCCAAGAAACCGAGGTT  
CCAAGTCGGCCAAAGACAAGTGAGAATTAATAATTTTGTTTAACTTTAAGAAGGAGATATACATATGGCCAAAGTCCCGTCCAGGCGGCAAGGCTTCCAGAAAGCGG  
TGACCAAGACTCAGAAGAAGACGGGAAAAAGCGCAGGAAAGCAAGGAAGAGATTATGCCATTTACGTGTACAAGGTTGTAAGCAGGTTGACCCCCGATACCGGCATCT  
CGTCAAGGCCATGAGCATGAACTCTTGTCAACGATGTTTGGGCGATTCGAGGGGAAAGCTCCCGCTGGCTCATTAACAACACCGCTCCACCATCACTTAAAGT  
GGGAGATCCAGACCGCGTCCGACTGCTGCTGGGGAGTTGGCCAAACACCGCGTTCGAGGGGCAACAGGCTGTCACCAAGTCCAGGCTTCCAGGCTTAAAGTAAAGTTCGACA  
ATAATTTTGTAACTTTAAGAAGGAGATATACATATGGCCGTTACCAAGCAGACCGCCGTTAAATCCAGCGAGGAAAGGCTCCCGCAAGCAGCTGGCCACCAAGGCAG  
CCAGAAAGTCCGCTCCTGCTACCGCGGAGTCAAGAAACCTCACCCTTACCAGCGCGGCAAGTTCGCTCCGCGAGATCCGCGCTTACCAGAAATCCACCGAGCTGCTCA  
TCCGAAACTGCCTTTCAGCGCTTGGTCCGGAGATCGCTCAGGACTTCAAGACCGACTTCCGCTCCAGAGCTCCGCGCTTATGGCTCTGCAGGAGGCGCAGCGGCTT  
ATCTGGTCGCTCCTTTGAGGACCAACCTGTGCCCATCCACGCCAAGAGGTTACCATCATGCCAAGGACTCCAGCTGGCCCGCAGAAATCCGAGCGGAGAGGGCTT  
AGGGCGCGCAATAATTTTGTAACTTTAAGAAGGAGATATACATATGCTTGGTCTGGTAAAGTGGTAAAGGTTGGGTTAAAGTGGTCTAAACGTCAACCGTCAACCTTAAAGT  
TCTGGTGACAACATCCAGGGTATACCAAGCGCGCTTCCGCTGCTGGCTCGCTGGTTTAAACGTATCTCCGCTGTAGTCTACGAAAGAAACCGCGGTTCTCT  
GAAAGTTTTCTGAAAACGTTATCCGTGACGCTGTACCTACACCGAACACGCTAAACGTAAACCGTTACCCTATGGAGTGTGTTACGCTCTGAAACGTGAGGTTG  
TACCTGTACGGTTTTGCTGGTAGCAGCGGCTGCTGCCGCGCGCAGCTCGAGCACACCCACCACTGAGATCCGCGTGTAAACAAAGCCCGAAAGGAAAGGCTGA  
GTTGGTCTGCCACCGCTGAGCAATAACTAGCATAACCCCTTGGGCGCTTAAACGGGTTTGGGGTTTTTGGTGAAGGAGGAACTATACTCCGAT

### 3. Supplementary Table 1 & 2

**Table S1.** PCR primers used in this study.

| Name                           | Sequence                                                                           |
|--------------------------------|------------------------------------------------------------------------------------|
| BglII_His <sub>6</sub> _KpnI_F | C AGCCCAGATCTG CACCACCACCACCACCAC <u>GGTACC</u> CTGGTG                             |
| BglII_His <sub>6</sub> _KpnI_R | CACCAG <u>GGTACC</u> GTGGTGGTGGTGGTGGTG <u>CAGATCTGGGCT</u> G                      |
| NcoI_xeH2A_F                   | acttga <u>CCATGG</u> gt ATGTCAGGAAGAGGCAAA                                         |
| EcoRI_xeH2A_R                  | cacaca <u>GAATTC</u> TCACTTGCTCTTGGCCGA                                            |
| EcoRI_RBS_xeH2B_F              | acttga <u>GAATTC</u> AATAATTTTGTTTAACTT<br>TAAGAAGGAGATATACAT ATGGCCAAGTCCGCTCCA   |
| SalI_xeH2B_R                   | cacaca <u>GTCGAC</u> TTAAGTGGCGCTGGTGTGTA                                          |
| SalI_RBS_xeH3_F                | acttga <u>GTCGAC</u> AATAATTTTGTTTAACTT<br>TAAGAAGGAGATATACAT ATGGCCCGTACCAAGCAG   |
| NotI_xeH3_R                    | cacaca <u>GCGGCCGC</u> CTAAGCCCTCTCGCCTCG                                          |
| NotI_RBS_xeH4_F                | acttga <u>GCGGCCGC</u> AATAATTTTGTTTAACTT<br>TAAGAAGGAGATATACAT ATGTCTGGTCGTGGTAAA |
| XhoI_Thrombin-xeH4_R           | cacaca <u>CTCGAG</u> GCTGCCGCGCGGCACCAGGCCGCTGCT<br>ACCACCGAAACCGTACAG             |

\*Restriction enzyme sites are underlined and RBS's are indicated in red.

**Table S2.** Restriction enzymes and affinity tags used for the histones.

| Histone | (5')<br>Restriction<br>Enzyme | (3')<br>Restriction<br>Enzyme | Affinity tags                                                                         |
|---------|-------------------------------|-------------------------------|---------------------------------------------------------------------------------------|
| H2A     | NcoI                          | EcoRI                         | An N-terminal S-tag followed by a His <sub>6</sub> -tag and a thrombin cleavage site. |
| H2B     | EcoRI                         | SalI                          | None                                                                                  |
| H3      | SalI                          | NotI                          | None                                                                                  |
| H4      | NotI                          | XhoI                          | A C-terminal His <sub>6</sub> -tag preceded by a thrombin site.                       |

#### 4. Supplementary Figures 1-3

**Fig. S1.** Co-expression and purification of histone octamers. **(A)** All four histones were induced and overexpressed upon adding 0.4 mM IPTG. Induced and uninduced cells are indicated by (+) and (-) IPTG, respectively. M: molecular weight marker. **(B)** Most histones were recovered in the soluble fraction of the cell lysate. C: total cell lysate, S: cell supernatant, P: cell pellet fraction. All lanes represent 50  $\mu$ l of cell culture. **(C)** The affinity tags on H2A and H4 could be digested completely within 3 hours of thrombin addition at 4 °C. Undigested and digested samples are indicated with (-) and (+) thrombin, respectively. Numbers above the lanes 3-5 indicate the number of hours after thrombin addition.

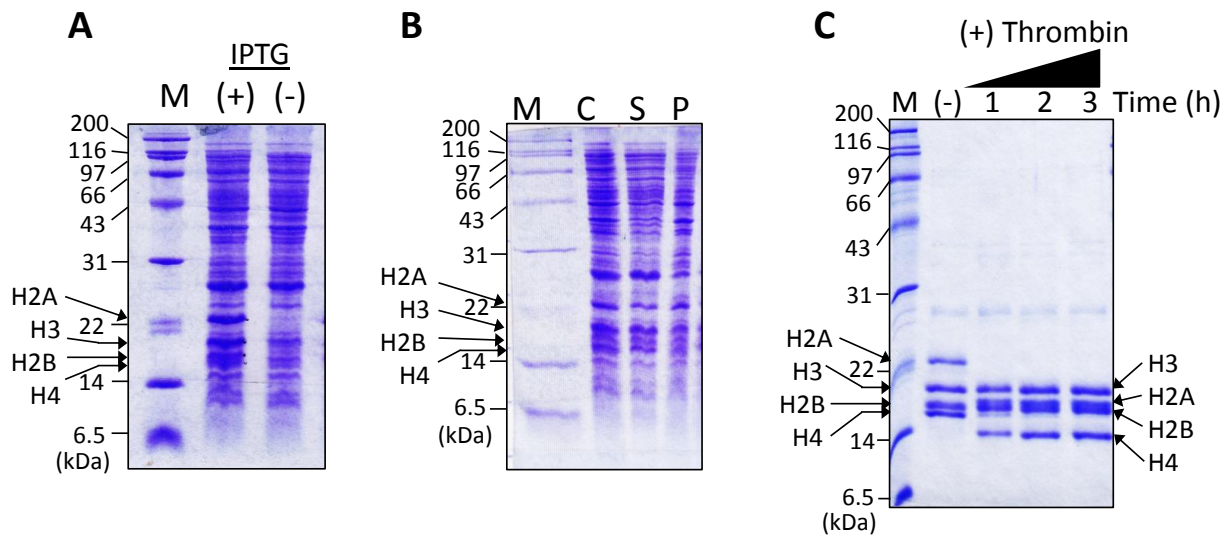

**Fig. S2.** Biochemical characterization of purified histones. **(A)** Size-exclusion chromatogram of purified histone products. Histones elute at 12.8 ml as in Fig. 2E with stoichiometric ratio of all histones. The void volume peak observed in Fig. 2E no longer exists. **(B)** Calibration curve for the Superdex 200 column used in this study. According to this curve, the molecular weight of the histone complexes eluting at 12.8 ml is 111 kDa, closely matching that of the octamer (109 kDa).  $K_{av}$  and Log MW were calculated as described in the product manual for the size-exclusion column molecular weight calibration kit (GE Healthcare). **(C)** SDS-PAGE gel of the histone fractions shown in (B). M: molecular weight marker, I: input, 7-14 indicate fraction numbers. **(D)** SDS-PAGE of histone octamers prepared by a conventional method [10] and the histones purified in Fig. 2.

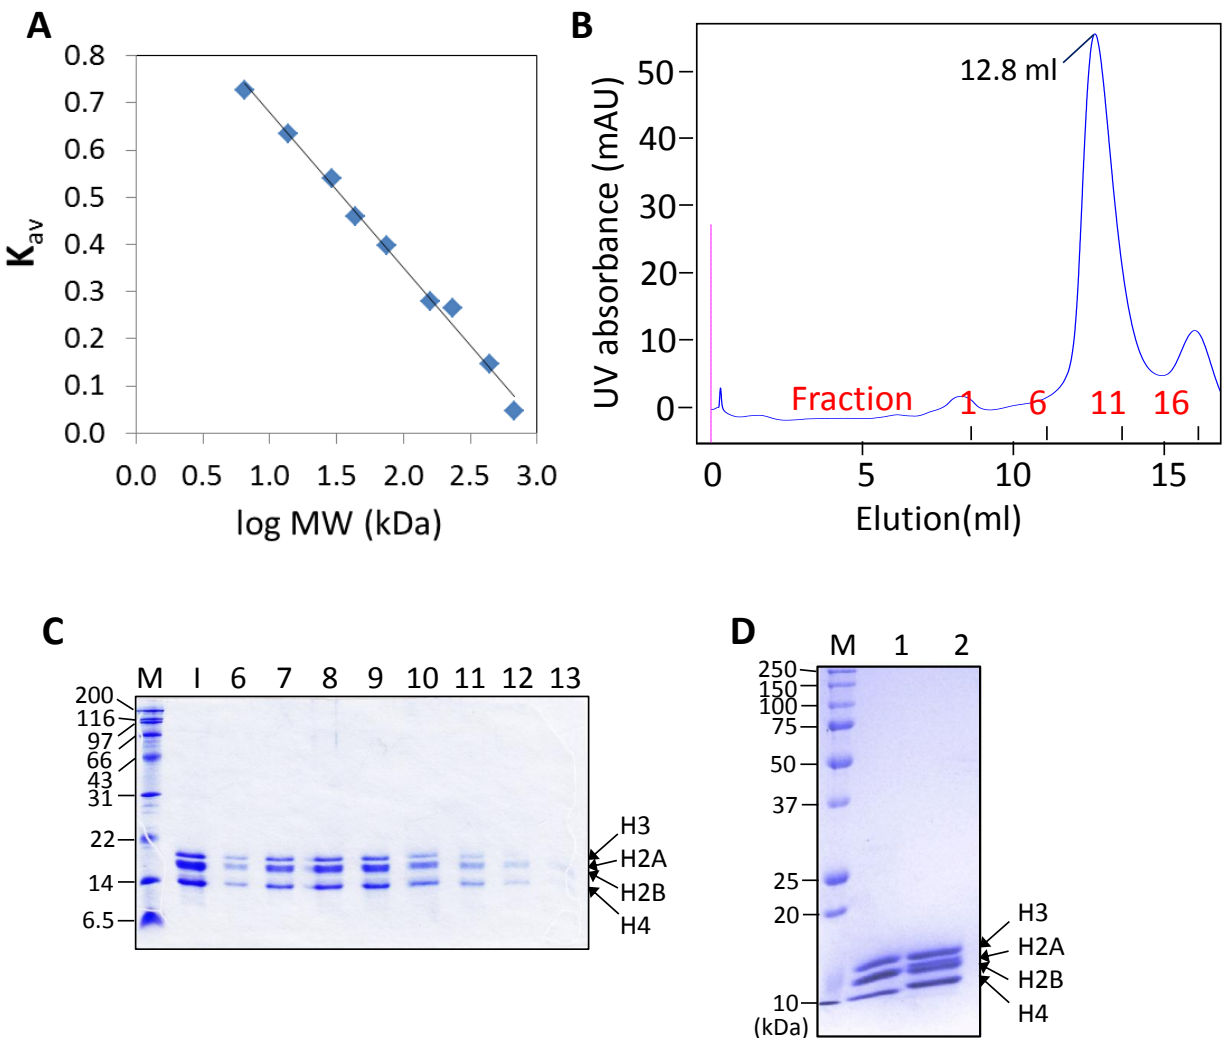



**Fig. S3.** Schematic diagrams of the locations of donor (Cy3) and acceptor (Cy5) on a naked DNA (**A**) and a nucleosome (**B**). The formation of NCPs with the purified histones can be confirmed by FRET peak of the acceptor as shown in Fig. 2B.

**A**

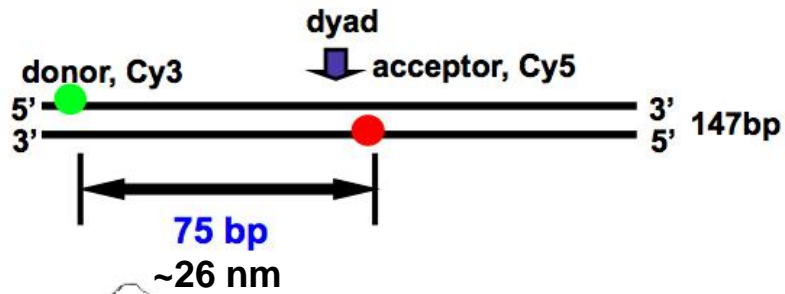

**B**

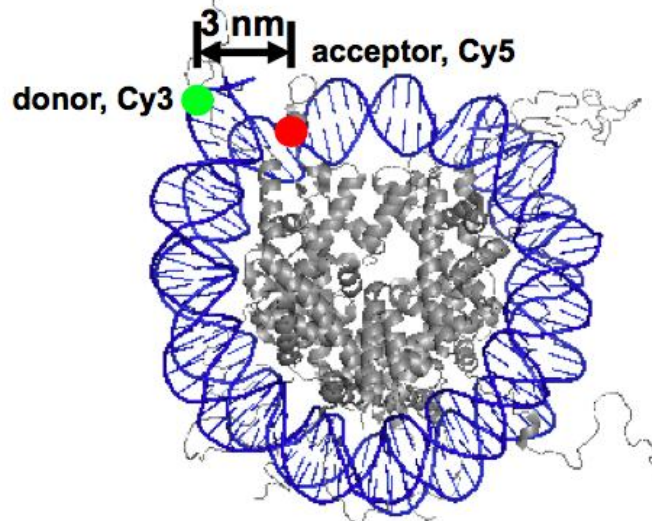

Supplement: NIHMS392232-supplement-01.pdf [file NIHMS392232-supplement-01.pdf]
